# Supplementary material for: A Positive Feed Forward Loop between Wnt/β-Catenin and NOX4 Promotes Silicon Dioxide-Induced Epithelial-Mesenchymal Transition of Lung Epithelial Cells
Source: Hindawi journal article supplement (doi:10.1155/2020/3404168), 2020-12-08
Supplement: f1 [file 3404168.f1.pdf]

**Suppl. Table 1. Primary and secondary antibodies used for immunostaining**

| Protein                            | Vendor         | Product no. | Type              | Dilution | Figure          |
|------------------------------------|----------------|-------------|-------------------|----------|-----------------|
| Wnt3a                              | Abcam          | ab28472     | Rabbit polyclonal | 1:100    | Fig.1 and Fig.2 |
| Active- $\beta$ -catenin           | CST            | #8814       | Rabbit monoclonal | 1:200    | Fig.1 and Fig.2 |
| $\alpha$ -SMA                      | Abcam          | ab5694      | Rabbit polyclonal | 1:200    | Fig.1 and Fig.3 |
| Vimentin                           | CST            | #5741S      | Rabbit monoclonal | 1:200    | Fig.3           |
| NOX4                               | Abcam          | ab133303    | Rabbit monoclonal | 1:200    | Fig.3           |
| Alexa Fluor 488 Donkey anti-Rabbit | Jackson Immuno | 109010      |                   | 1:500    |                 |

**Suppl. Table 2. Primary and secondary antibodies used for Western blotting**

| Protein                  | Vendor      | Product no. | Type              | Dilution | Figure               |
|--------------------------|-------------|-------------|-------------------|----------|----------------------|
| Wnt3a                    | Abcam       | ab28472     | Rabbit polyclonal | 1:1000   | Fig.1, 2, 4, 5 and 6 |
| Active- $\beta$ -catenin | CST         | #8814       | Rabbit monoclonal | 1:1000   | Fig.1,2, 4-6         |
| Axin2                    | Proteintech | 20540-1-AP  | Rabbit Polyclonal | 1:1000   | Fig.1, 6             |
| DKK1                     | Proteintech | 21112-1-AP  | Rabbit Polyclonal | 1:1000   | Fig.4-6              |
| GSK-3 $\beta$            | Proteintech | 22104-1-AP  | Rabbit Polyclonal | 1:1000   | Fig.6A               |
| MMP2                     | Proteintech | 10373-2-AP  | Rabbit Polyclonal | 1:1000   | Fig.4A               |
| E-cadherin               | Proteintech | 20874-1-AP  | Rabbit Polyclonal | 1:1000   | Fig.3-6              |
| $\alpha$ -SMA            | Abcam       | ab5694      | Rabbit polyclonal | 1:1000   | Fig.1, 3-6           |
| Vimentin                 | CST         | #5741S      | Rabbit monoclonal | 1:1000   | Fig.1, 3-6           |
| NOX1                     | BOSTER      | BA3720      | Rabbit Polyclonal | 1:1000   | Fig.3                |
| NOX3                     | Proteintech | 20065-1-AP  | Rabbit Polyclonal | 1:1000   | Fig.3                |
| NOX4                     | Abcam       | ab133303    | Rabbit monoclonal | 1:1000   | Fig.3, 5             |
| NOX4                     | NOVUS       | NB110-58849 | Rabbit Polyclonal | 1:500    | Fig.1, 6             |
| NOX5                     | BOSTER      | BA2819      | Rabbit Polyclonal | 1:1000   | Fig.3                |
| Histone H3               | Millipore   | 06-755      | Rabbit Polyclonal | 1:1000   | Fig.6                |

|                  |             |            |                   |        |         |
|------------------|-------------|------------|-------------------|--------|---------|
| Nrf2             | Proteintech | 16396-1-A  | Rabbit Polyclonal | 1:1000 | Fig.6   |
| HO-1             | Proteintech | 27282-1-AP | Rabbit Polyclonal | 1:1000 | Fig.6   |
| Bcl-2            | SANTA CRUZ  | sc-783     | Rabbit Polyclonal | 1:1000 | Fig.6   |
| Bcl-xl           | Proteintech | 26967-1-AP | Rabbit Polyclonal | 1:1000 | Fig.6   |
| caspase3         | Proteintech | 19677-1-AP | Rabbit Polyclonal | 1:1000 | Fig.6   |
| P53              | SANTA CRUZ  | sc-1312    | Goat polyclonal   | 1:1000 | Fig.6   |
| CyclinD1         | Proteintech | 60186-1-Ig | Mouse Monoclonal  | 1:1000 | Fig.6   |
| GAPDH            | Bioss       | BS-2188R   | Rabbit Polyclonal | 1:2000 | Fig.1-6 |
| $\beta$ -actin   | Proteintech | 60008-1-Ig | Mouse Monoclonal  | 1:2000 |         |
| Goat-anti-Rabbit | ZSGB-BIO    | ZB-2301    |                   | 1:5000 |         |
| Goat-anti-Mouse  | ZSGB-BIO    | ZB-2305    |                   | 1:5000 |         |
| Donkey-anti-goat | Jackson Imm | 109291     |                   | 1:5000 |         |
